# Supplementary material
Source: publisher site journal article supplement (https://www.dovepress.com/article/442591)
Supplement: Supplementary file 1 [file get_supplementary_file.php]

# Extracting systemic anticancer treatment lines from the Danish National Patient Registry for solid tumour patients treated in the North Denmark Region between 2009 and 2019

## Supplementary material

### Mapping SKS procedure codes to ATC

The procedure codes for treatment used in this study were mapped to the Anatomical Therapeutic Chemical (ATC) classification (see Supplementary Figure 1). SKS codes that were not directly related to one or a set of ATC codes were considered generic. For generic SKS codes (for example “BOHJ19B”), subcodes (for example “BOHJ19B1” and “BOHJ19B2”) were used to infer a generic ATC code (in this example “L01FG”). Subcodes were considered directly related to their parent code (for example “BOHJ19B1” is directly related to “BOHJ19B” and “BOHJ19”, see Supplementary Figure 1). The SKS codes were kept to group registrations into treatment lines as detailed in the main document.

## Supplementary tables

Supplementary Table 1 - Primary tumour location grouping, inclusion status, and exclusion criteria.

| ICD10                        | Primary tumour location      | Specific group | Reason                                                                       |
|------------------------------|------------------------------|----------------|------------------------------------------------------------------------------|
| C00-C14, C30-C33             | Head and neck                | No             | Relatively rare and not primarily treated with systemic anticancer treatment |
| C15-C16                      | Gastro-oesophageal           | Yes            |                                                                              |
| C17                          | Intestine                    | No             | Rare                                                                         |
| C18-C20                      | Colorectal                   | Yes            |                                                                              |
| C21                          | Anal                         | No             | Rare                                                                         |
| C22-C24                      | Hepato-biliary               | No             | Referred to other hospitals                                                  |
| C25                          | Pancreatic                   | Yes            |                                                                              |
| C26, C39, C55, C57, C76, C80 | Ill-defined                  | No             | Ill-defined                                                                  |
| C34                          | Lung                         | Yes            |                                                                              |
| C37-C38                      | Thoracic other than lung     | No             | Rare                                                                         |
| C40-C41                      | Bone and articular cartilage | No             | Rare                                                                         |
| C43                          | Melanoma                     | No             | Referred to other hospitals                                                  |
| C44                          | Skin other than melanoma     | No             | Not treated with systemic anticancer treatment                               |
| C45-C49                      | Connective and soft tissue   | No             | Rare                                                                         |
| C50                          | Breast                       | Yes            |                                                                              |
| C51-C52                      | Vulva and vagina             | No             | Rare                                                                         |
| C53                          | Cervical                     | No             | Referred to other hospitals                                                  |
| C54                          | Endometrial                  | Yes            |                                                                              |
| C56                          | Ovarian                      | Yes            |                                                                              |
| C58                          | Placenta                     | No             | Rare                                                                         |
| C61                          | Prostate                     | Yes            |                                                                              |
| C64-C68                      | Urinary                      | Yes            |                                                                              |
| C69-C70                      | Eye and meninges             | No             | Rare                                                                         |
| C71                          | Brain                        | Yes            |                                                                              |
| C72                          | Nervous system               | No             | Rare                                                                         |
| C73-C75                      | Endocrine                    | No             | Rare                                                                         |
| C77-C79                      | Secondary                    | No             | Not primary                                                                  |

Supplementary Table 2 – Thresholds used according to the SKS codes of two consecutive prescriptions.

| Prescription 2<br>Prescription 1 | Same spec. SKS code<br>(e.g. BWHA109) | Rel. gen. SKS code<br>(e.g. BWHA1) | Diff. spec. SKS code<br>(e.g. BOHJ19J3) | Diff. gen. SKS code<br>(e.g. BOHJ1) |
|----------------------------------|---------------------------------------|------------------------------------|-----------------------------------------|-------------------------------------|
| Spec. SKS code<br>(e.g. BWHA109) | Same drug                             | Same drug class                    | Different drugs                         | Different drug class                |
| Gen. SKS code<br>(e.g. BWHA1)    | Same drug class                       | Same drug class                    | Different drug classes                  | Different drug classes              |

*Spec.: Specific; Gen.: Generic; Rel.: Related; Diff.: Different*

Supplementary Table 3 – Thresholds, systemic anticancer treatment lines or patients, and accuracy in terms of sensitivity, PPV and F1 score for the full dataset for the 3 matching types.

| Method                      | TT        | MedOnc | DNPR   | Matching | Sensitivity | PPV   | F1 score |
|-----------------------------|-----------|--------|--------|----------|-------------|-------|----------|
| <b>Stringent matching</b>   |           |        |        |          |             |       |          |
| <b>Time-based</b>           | 49        | 15,433 | 13,912 | 6,473    | 0.419       | 0.465 | 0.441    |
| <b>Mixed</b>                | 33        | 15,433 | 12,942 | 6,400    | 0.415       | 0.495 | 0.451    |
| <b>Grid search</b>          | (33, 175) | 15,433 | 13,452 | 6,727    | 0.436       | 0.500 | 0.466    |
| <b>Loose matching</b>       |           |        |        |          |             |       |          |
| <b>Time-based</b>           | 45        | 15,433 | 14,231 | 12,134   | 0.786       | 0.853 | 0.818    |
| <b>Mixed</b>                | 29        | 15,433 | 13,272 | 11,873   | 0.769       | 0.895 | 0.827    |
| <b>Grid search</b>          | (29, 175) | 15,433 | 13,782 | 12,240   | 0.793       | 0.888 | 0.838    |
| <b>Line number matching</b> |           |        |        |          |             |       |          |
| <b>Time-based</b>           | 45        | 8,738  | 8,867  | 6,299    | 0.721       | 0.710 | 0.716    |
| <b>Mixed</b>                | 31        | 8,738  | 8,867  | 6,170    | 0.706       | 0.696 | 0.701    |
| <b>Grid search</b>          | (31, 65)  | 8,738  | 8,867  | 6,395    | 0.732       | 0.721 | 0.726    |

*TT: Time threshold(s) in days between two consecutive drug prescriptions. The values in parentheses for thresholds for the grid search are the “different drugs” and “same drug” thresholds in that order. The MedOnc, DNPR, and Matching columns show the number of lines found in MedOnc, DNPR, and matching in both, respectively. For the line number matching, the numbers shown are for the number of patients.*

## Supplementary figures

Supplementary Figure 1 – Example of mapping from SKS codes to ATC codes.

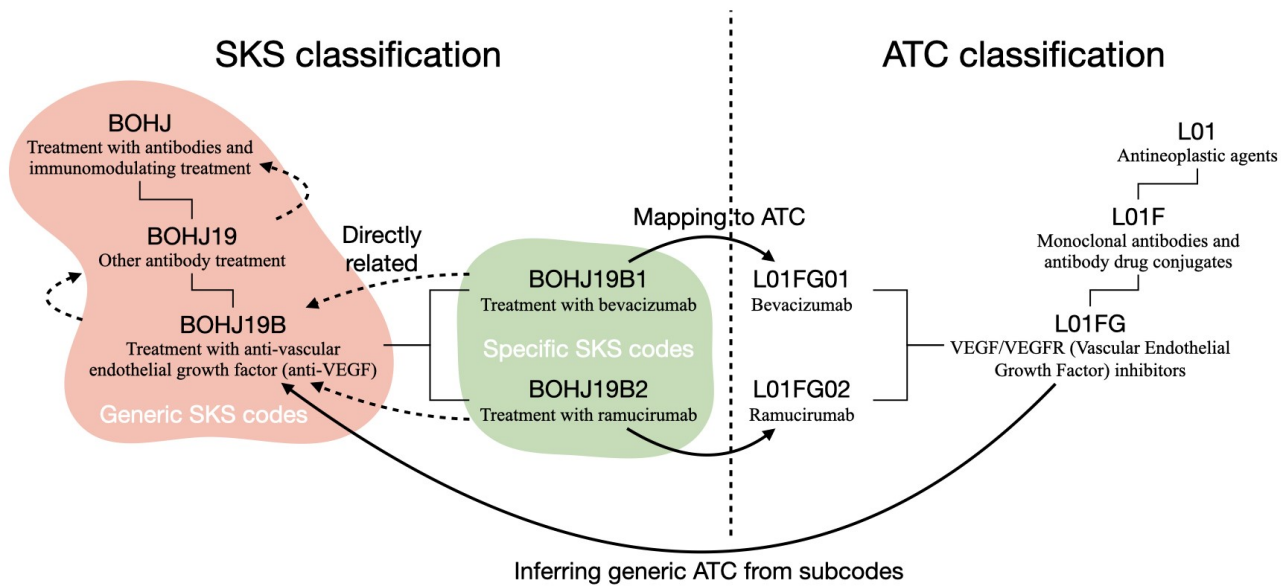

In this example, the focus is on treatment with anti-vascular endothelial growth factor (SKS code BOHJ19B) and the mapping of the specific codes BOHJ19B1 and BOHJ19B2 to ATC. Direct relation is illustrated by a dashed arrow. The green area includes the specific codes while the red area includes the generic codes.

Supplementary Figure 2 – Pseudocode for the 4 different methods used.

Let  $p_1$  and  $p_2$  be two consecutive drug prescriptions, at times  $t_1$  and  $t_2$  and for drugs with SKS code  $c_1$  and  $c_2$ , respectively. The interval between  $p_1$  and  $p_2$  is noted  $\Delta t = t_2 - t_1$ .  $threshold$  is the time threshold in days for each method. For the grid search method, two time thresholds are used,  $threshold_{same}$  and  $threshold_{diff}$ .

### Time-based method:

```

if  $\Delta t \leq threshold$  then
   $p_1$  and  $p_2$  belong to the same line
else
   $p_1$  and  $p_2$  belong to different lines
  
```

### Drug-based method:

```

if  $c_1$  is generic or  $c_2$  is generic then
  if  $\Delta t \leq threshold$  then
     $p_1$  and  $p_2$  belong to the same line
  else
     $p_1$  and  $p_2$  belong to different lines
else
  if  $c_1 = c_2$  then
     $p_1$  and  $p_2$  belong to the same line
  else
     $p_1$  and  $p_2$  belong to different lines
  
```

### Mixed method:

```

if  $c_1$  related to  $c_2$  or  $c_1 = c_2$  then
  if  $\Delta t \leq threshold$  then
     $p_1$  and  $p_2$  belong to the same line
  else
     $p_1$  and  $p_2$  belong to different lines
else
   $p_1$  and  $p_2$  belong to different lines
  
```

### Grid search method:

```

if  $c_1$  related to  $c_2$  or  $c_1 = c_2$  then
  if  $\Delta t \leq threshold_{same}$  then
     $p_1$  and  $p_2$  belong to the same line
  else
     $p_1$  and  $p_2$  belong to different lines
else
  if  $\Delta t \leq threshold_{diff}$  then
     $p_1$  and  $p_2$  belong to the same line
  else
     $p_1$  and  $p_2$  belong to different lines
  
```

Supplementary Figure 3 – Grid search on  $F_1$  score for the loose matching method.

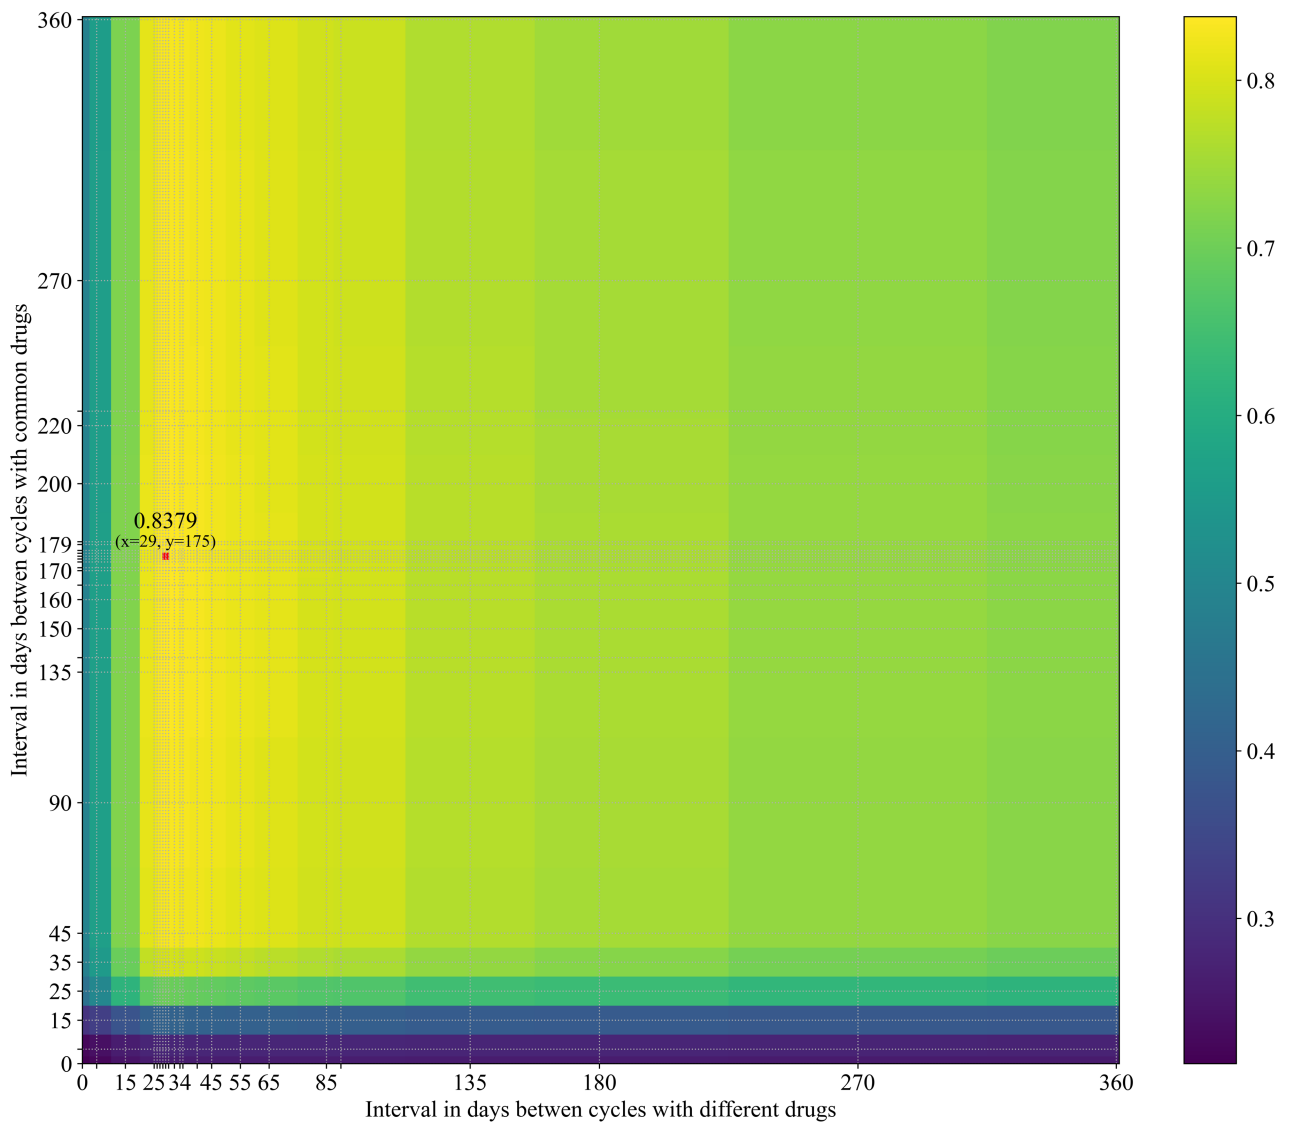

The red dot corresponds to the maximum  $F_1$  score, 0.8379 in that case. The corresponding coordinates are indicated,  $x$  being the “different drugs” threshold in days and  $y$  the “same drug” threshold.
